# Supplementary material for: Dopant-induced electronic design of redox-active elements in LiMn2O4 spinel structures
Source: Royal Society of Chemistry journal article supplement (doi:10.1039/d3cp00703k), 2023-01-01
Supplement: d3cp00703k1.pdf [file d3cp00703k1.pdf]

## Supporting Information

### **Dopant-Induced Electronic Design of Redox-Active Elements in $\text{LiMn}_2\text{O}_4$ Spinel**

#### **Structures**

*Jae Seung Seol,<sup>1</sup> Seungho Yu<sup>1</sup> and Ki Chul Kim<sup>1,2\*</sup>*

<sup>1</sup>Computational Materials Design Laboratory, Department of Chemical Engineering, Konkuk University, Seoul 05029,  
The Republic of Korea

<sup>2</sup>Division of Chemical Engineering, Konkuk University, Seoul 05029, The Republic of Korea

#### **Corresponding Author**

\*E-mail: kich2018@konkuk.ac.kr (K. C. Kim).

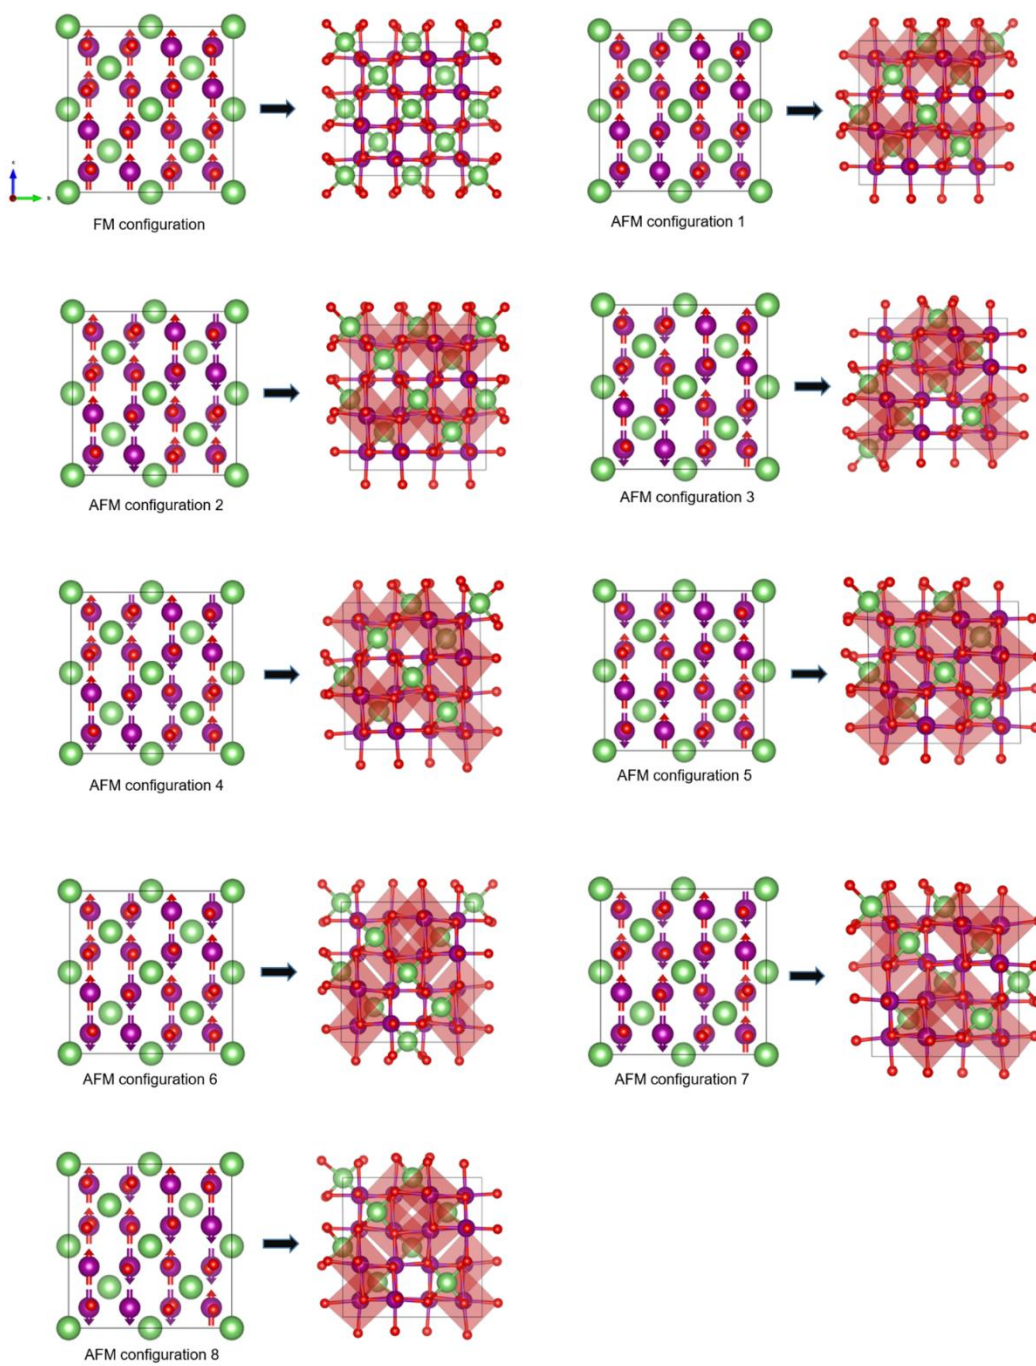

**Figure S1.** A total of nine possible configurations, such as one ferromagnetic (FM) and eight antiferromagnetic (AFM) configurations, for  $\text{LiMn}_2\text{O}_4$  supercell.

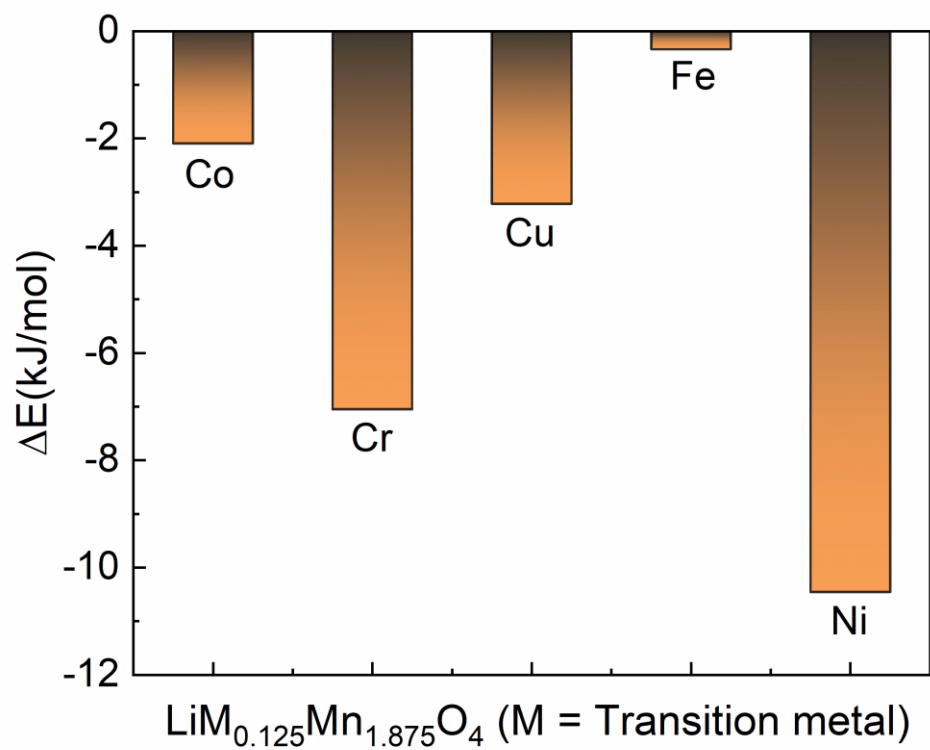

**Figure S2.** The DFT-computed energies ( $\Delta E$ ) of  $\text{LiM}_{0.125}\text{Mn}_{1.875}\text{O}_4$  (M = Co, Cr, Cu, Fe, and Ni) with M doped in  $\text{Mn}^{3+}$  position relative to those with M doped in  $\text{Mn}^{4+}$  position.

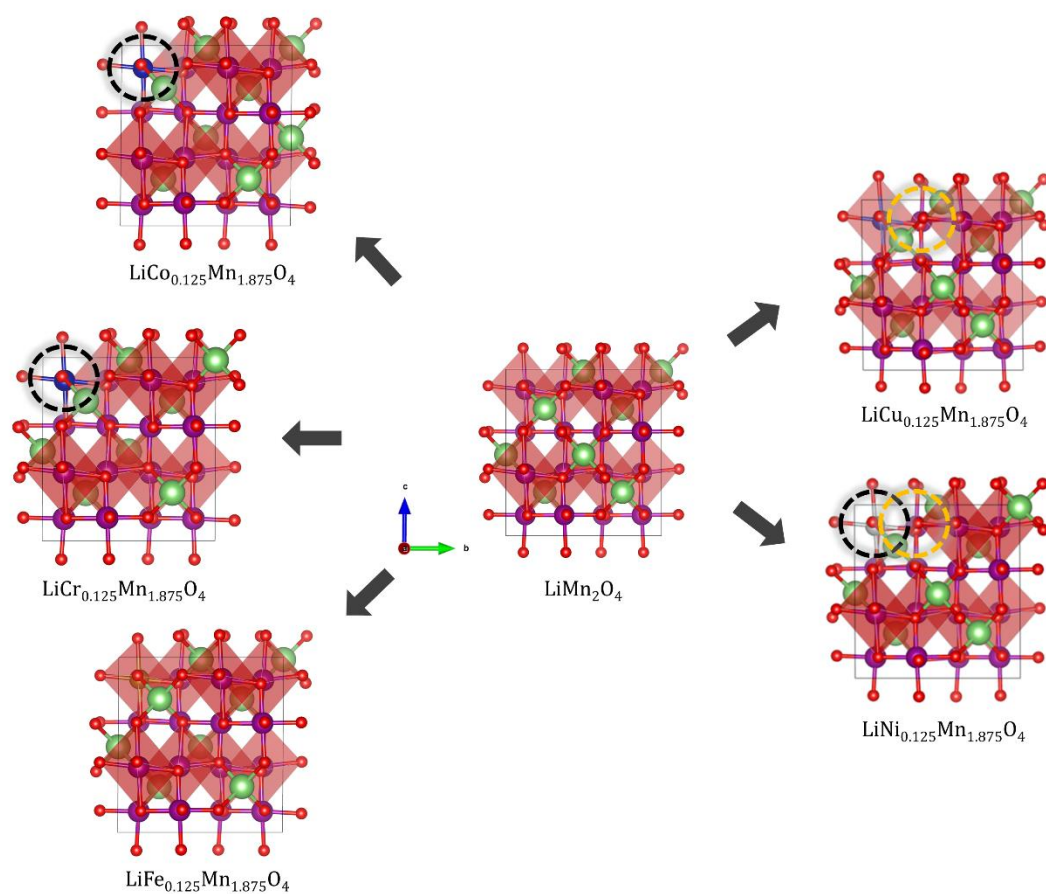

**Figure S3.** Reddish illustration of  $\text{MO}_6$  octahedra with asymmetric electron configurations in  $\text{LiM}_{0.125}\text{Mn}_{1.875}\text{O}_4$  ( $M = \text{Co, Cr, Cu, Fe, and Ni}$ ). Black dash circles are used to depict  $\text{MO}_6$  octahedra with symmetric electron configurations. Yellow dash circles are used to depict dopant-induced changes from  $\text{Mn}^{3+}$  to  $\text{Mn}^{4+}$ . For clarity, the eight intrinsic  $\text{Mn}^{4+}\text{O}_6$  octahedra in the structures provide no illustration.

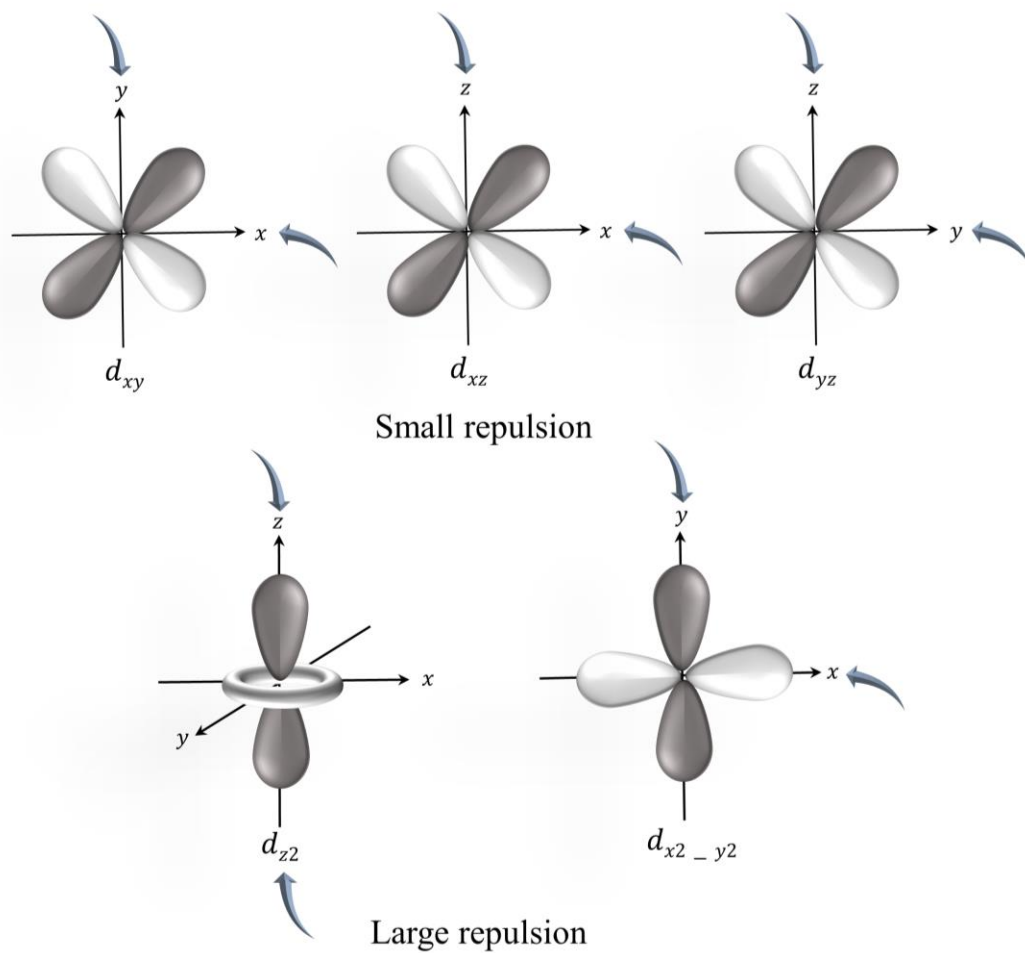

**Figure S4.** Five  $d$  orbitals in a crystal field theory. The directions coordinating ligands are an arrow are depicted by arrows.

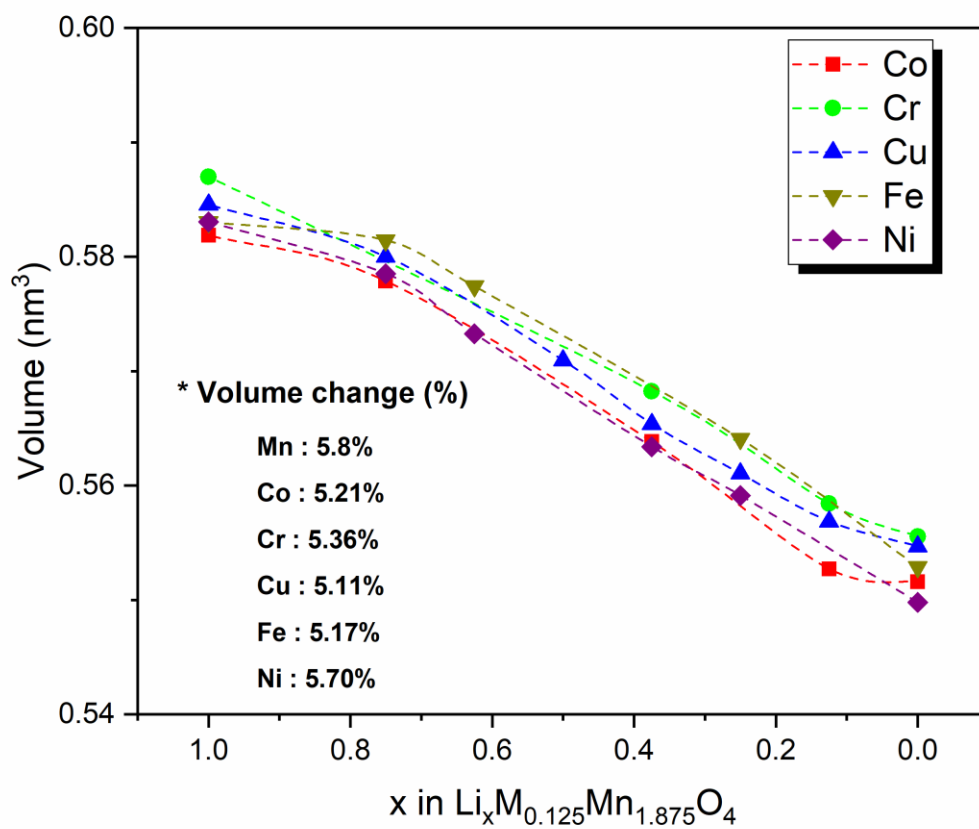

**Figure S5.** Volumetric changes of  $\text{LiM}_{0.125}\text{Mn}_{1.875}\text{O}_4$  ( $M = \text{Co}, \text{Cr}, \text{Cu}, \text{Fe}, \text{and Ni}$ ) experienced during the full delithiation process.

## Discharging process

### Group II : Co, Cr, Fe

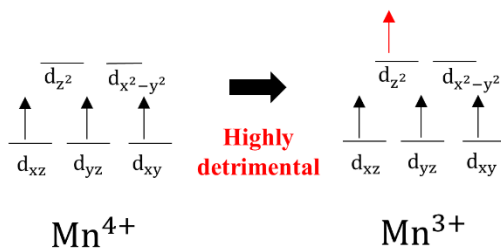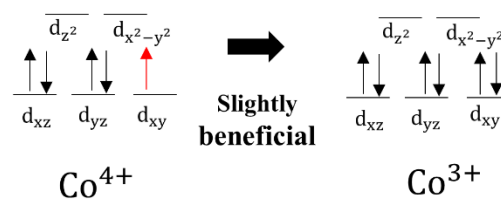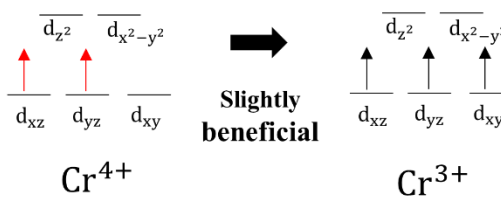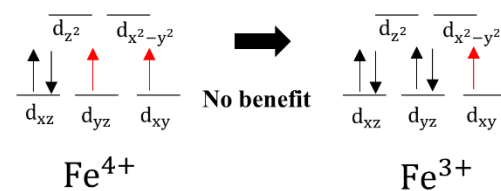

### Group III : Cu, Ni

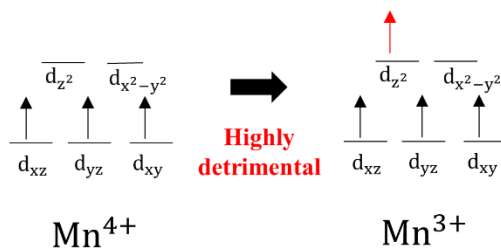

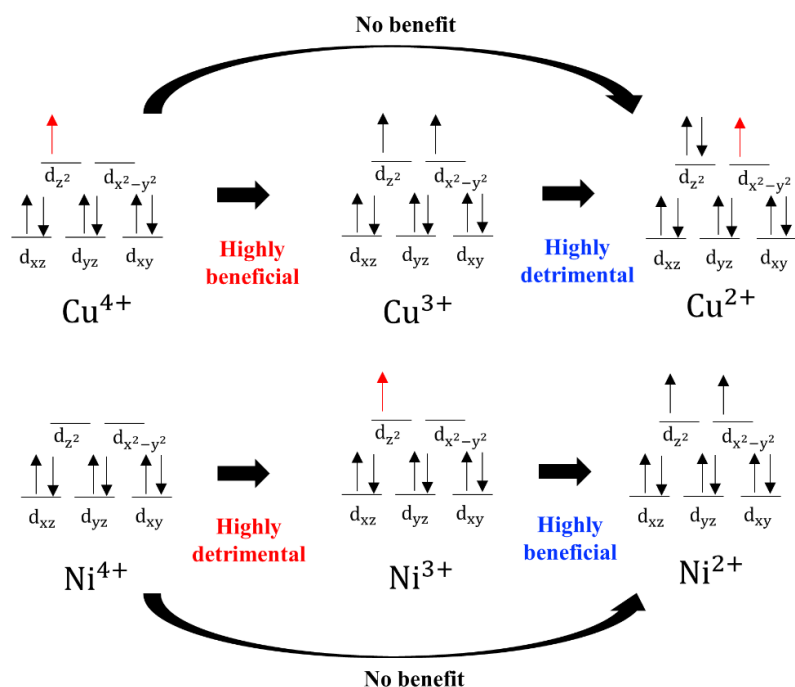

| Discharging process                                                                  | Reduction reaction                                                                                     | Highly detrimental | Slightly beneficial | No benefit |
|--------------------------------------------------------------------------------------|--------------------------------------------------------------------------------------------------------|--------------------|---------------------|------------|
| $\text{Mn}_{16}\text{O}_{32} \rightarrow \text{Li}_8\text{Mn}_{16}\text{O}_{32}$     | $\text{Mn}^{4+} \rightarrow \text{Mn}^{3+}(8e^-)$                                                      | 8                  | 0                   | 0          |
| $\text{Mn}_{15}\text{CoO}_{32} \rightarrow \text{Li}_8\text{Mn}_{15}\text{CoO}_{32}$ | $\text{Mn}^{4+} \rightarrow \text{Mn}^{3+}(7e^-)$<br>$\text{Co}^{4+} \rightarrow \text{Co}^{3+}(1e^-)$ | 7                  | 1                   | 0          |
| $\text{Mn}_{15}\text{CrO}_{32} \rightarrow \text{Li}_8\text{Mn}_{15}\text{CrO}_{32}$ | $\text{Mn}^{4+} \rightarrow \text{Mn}^{3+}(7e^-)$<br>$\text{Cr}^{4+} \rightarrow \text{Cr}^{3+}(1e^-)$ | 7                  | 1                   | 0          |
| $\text{Mn}_{15}\text{CuO}_{32} \rightarrow \text{Li}_8\text{Mn}_{15}\text{CuO}_{32}$ | $\text{Mn}^{4+} \rightarrow \text{Mn}^{3+}(6e^-)$<br>$\text{Cu}^{4+} \rightarrow \text{Cu}^{2+}(2e^-)$ | 6                  | 0                   | 2          |
| $\text{Mn}_{15}\text{FeO}_{32} \rightarrow \text{Li}_8\text{Mn}_{15}\text{FeO}_{32}$ | $\text{Mn}^{4+} \rightarrow \text{Mn}^{3+}(7e^-)$<br>$\text{Fe}^{4+} \rightarrow \text{Fe}^{3+}(1e^-)$ | 7                  | 0                   | 1          |
| $\text{Mn}_{15}\text{CoO}_{32} \rightarrow \text{Li}_8\text{Mn}_{15}\text{NiO}_{32}$ | $\text{Mn}^{4+} \rightarrow \text{Mn}^{3+}(6e^-)$<br>$\text{Ni}^{4+} \rightarrow \text{Ni}^{2+}(2e^-)$ | 6                  | 0                   | 2          |

**Figure S6.** Change in the electron configurations of  $\text{M}_{0.125}\text{Mn}_{1.875}\text{O}_4$  ( $M = \text{Mn}, \text{Co}, \text{Cr}, \text{Cu}, \text{Fe}, \text{and Ni}$ ) experienced during the discharging process and resultant energetic benefit/penalty. The number of transition metal elements associated with either the energetic benefit, penalty, or no benefit experienced during the discharging process is counted for each compound.



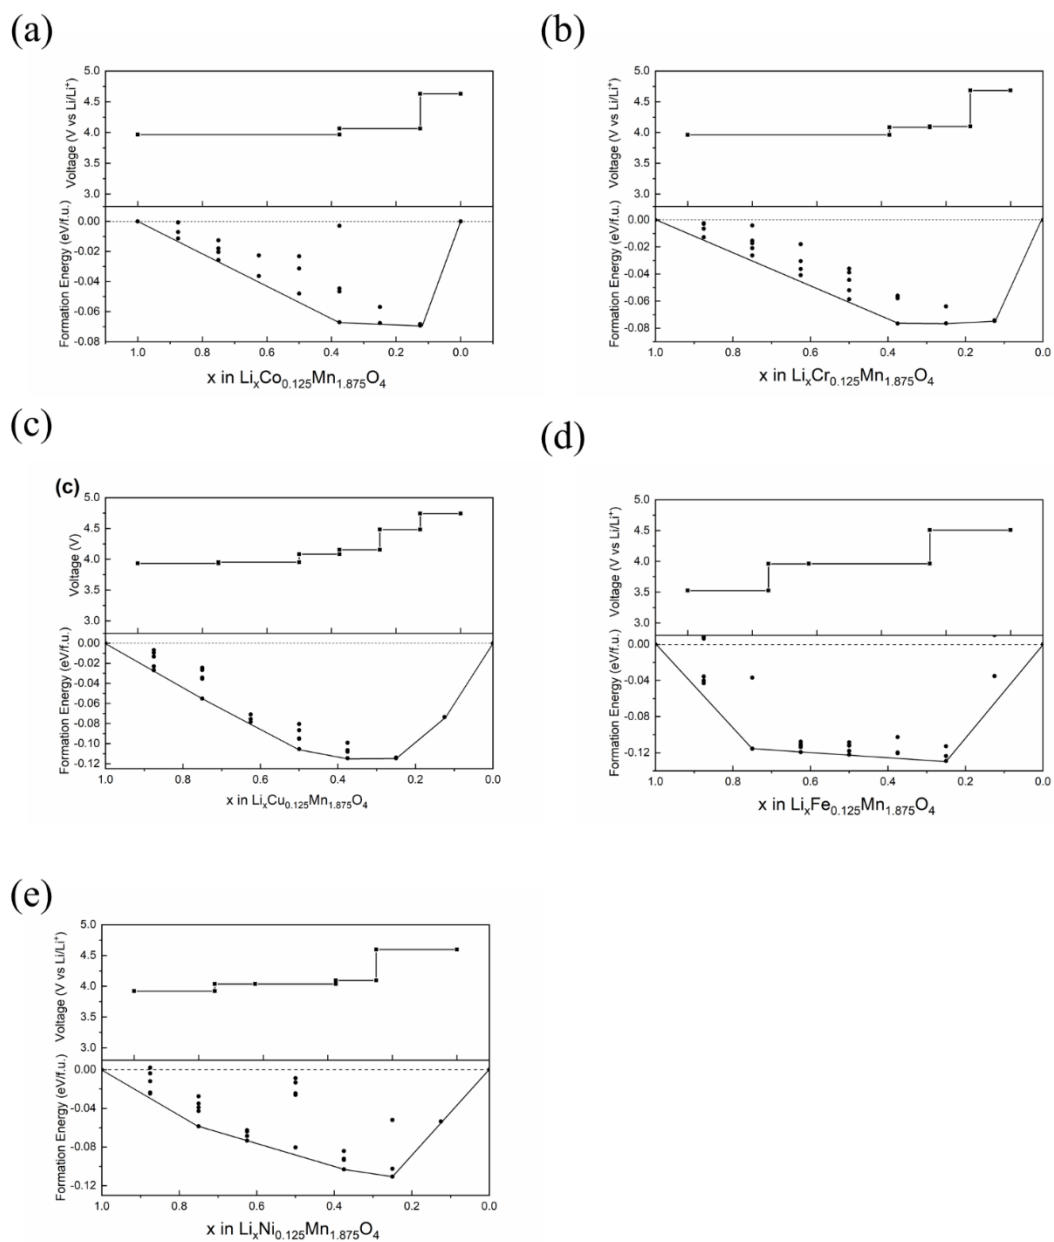

**Figure S7.** Formation energies and resultant voltages in the various delithiation levels for  $\text{Li}_x\text{M}_{0.125}\text{Mn}_{1.875}\text{O}_4$  ( $M =$  (a) Co, (b) Cr, (c) Cu, (d) Fe, and (e) Ni, where  $0 < x < 1$ ).

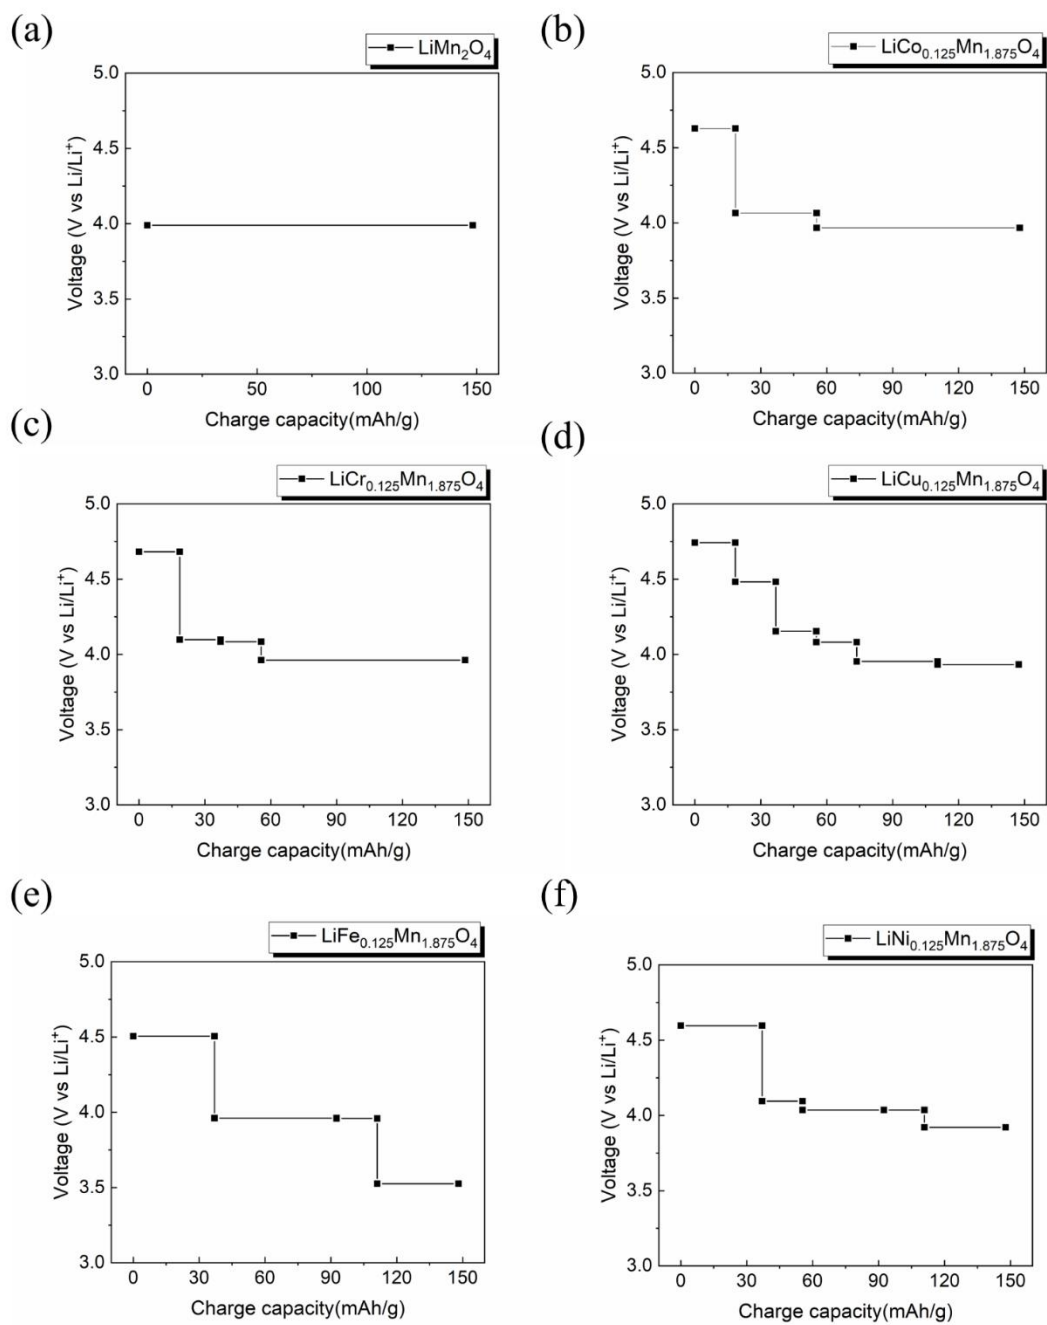

**Figure S8.** Theoretical charge capacity profiles for  $\text{Li}_x\text{M}_{0.125}\text{Mn}_{1.875}\text{O}_4$  ( $M =$  (a) Mn, (b) Co, (c) Cr, (d) Cu, (e) Fe, and (f) Ni, where  $0 < x < 1$ ).

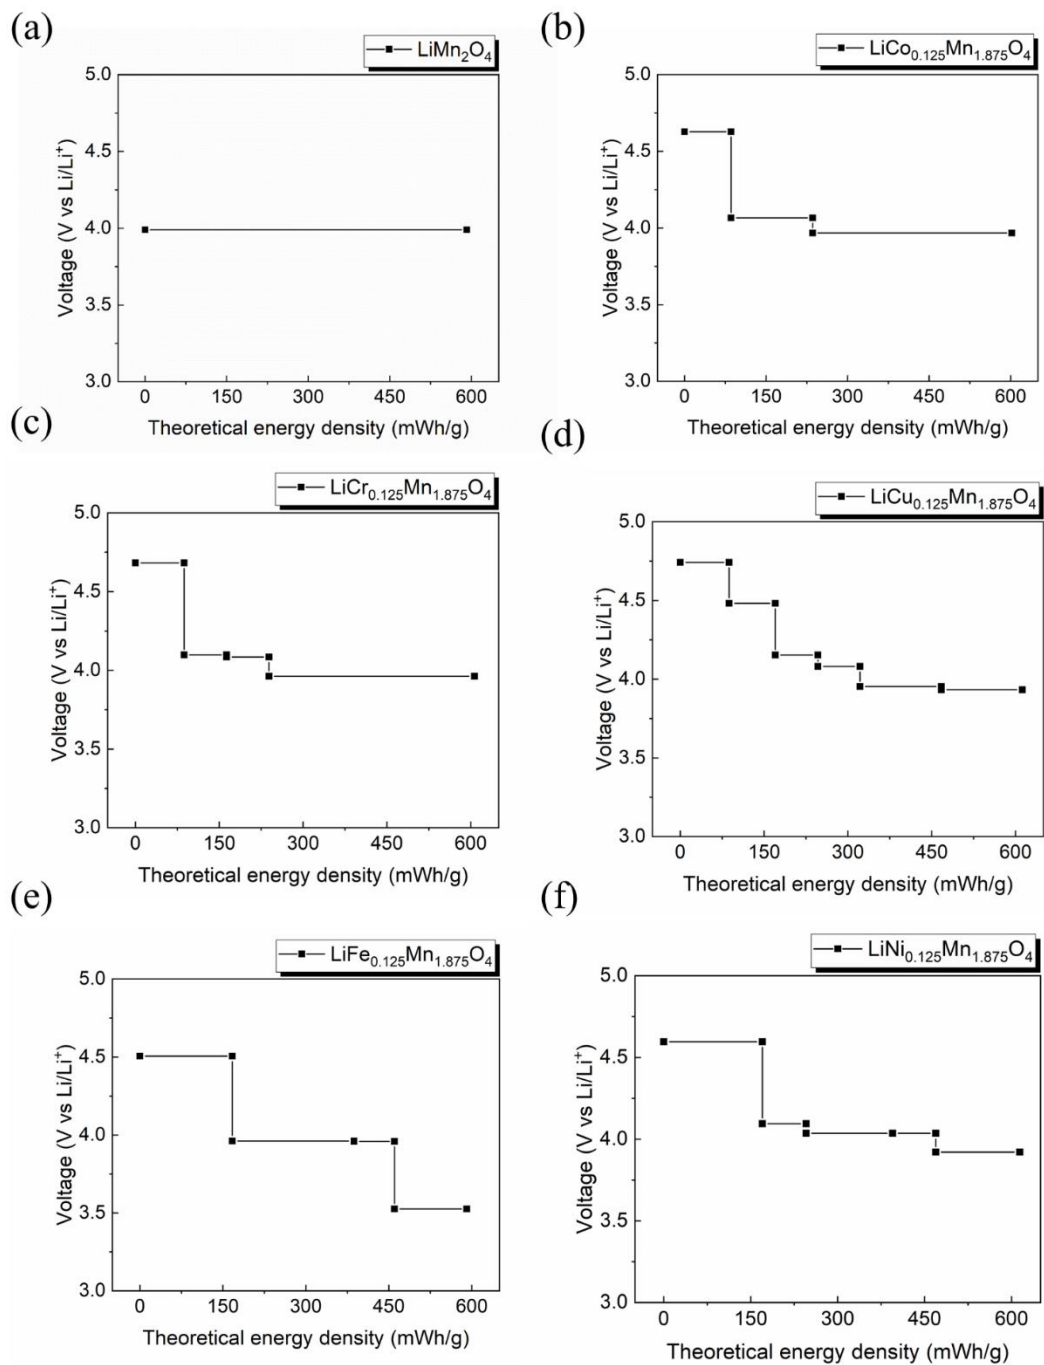

**Figure S9.** Theoretical energy density profiles for for  $\text{Li}_x\text{M}_{0.125}\text{Mn}_{1.875}\text{O}_4$  ( $M =$  (a) Mn, (b) Co, (c) Cr, (d) Cu, (e) Fe, and (f) Ni, where  $0 < x < 1$ ).
